# Supplementary material for: Exposure to Secondhand Tobacco Smoke at Airport Terminals
Source: J Environ Public Health. 2019 Feb 3;2019:9648761. doi: 10.1155/2019/9648761 (PMC6377972; doi:10.1155/2019/9648761)
Supplement: Supplementary Materials — S1: PM2.5 data by terminal location (.csv). [file 9648761.f1.csv]

location	vehicles/min	pm2.5	cig/min
1	34.6	28.3	1
1	78.1	24.2	0.5
1	51.4	14.8	0.5
1	46.7	15.6	0.6
1	43.1	19.3	0.5
1	87.8	28.7	0.6
1	57.6	17.8	0.1
1	18.4	26.6	0.7
1	76.5	16.3	0.5
1	54.4	43.8	1.4
1	22.1	15.3	0.5
1	49.5	32.7	0.6
1	66.9	19.4	0.4
1	31	11.9	0.3
1	46.7	22.3	0.4
1	34.1	23.6	0.7
1	66.1	17.5	0.5
1	56.8	25.5	0.6
1	38.1	12.2	0.2
1	64.6	17.4	0.3
2	31.9	15.6	0.6
2	43.6	17.5	0.9
2	47.2	12.7	0.2
2	74.3	18	0.5
2	69.9	18.6	1.4
2	85	17.2	1
2	47.4	13.9	0.8
2	76.8	15.7	0.4
2	47.3	9.6	0.6
2	84.8	17.8	0.9
2	71.5	12.8	0.3
2	41.4	16.1	0.6
2	64.5	15	0.8
2	23.9	14.8	0.7
2	44.8	13.7	1.1
2	71.4	15.5	0.2
2	61.4	14.4	0.5
2	54.8	13.9	0.4
2	80.2	17.6	0.6
2	46.6	18.1	0.5
